# Supplementary material for: Structures of the Mycobacterium tuberculosis efflux pump EfpA reveal the mechanisms of transport and inhibition
Source: PubMed Central journal article supplement — Nat Commun. 2024 Sep 4;15:7710. doi: 10.1038/s41467-024-51948-9 (PMC11375168; doi:10.1038/s41467-024-51948-9), 2024-09-04
Supplement: 41467_2024_51948_MOESM1_ESM.pdf [file 41467_2024_51948_MOESM1_ESM.pdf]

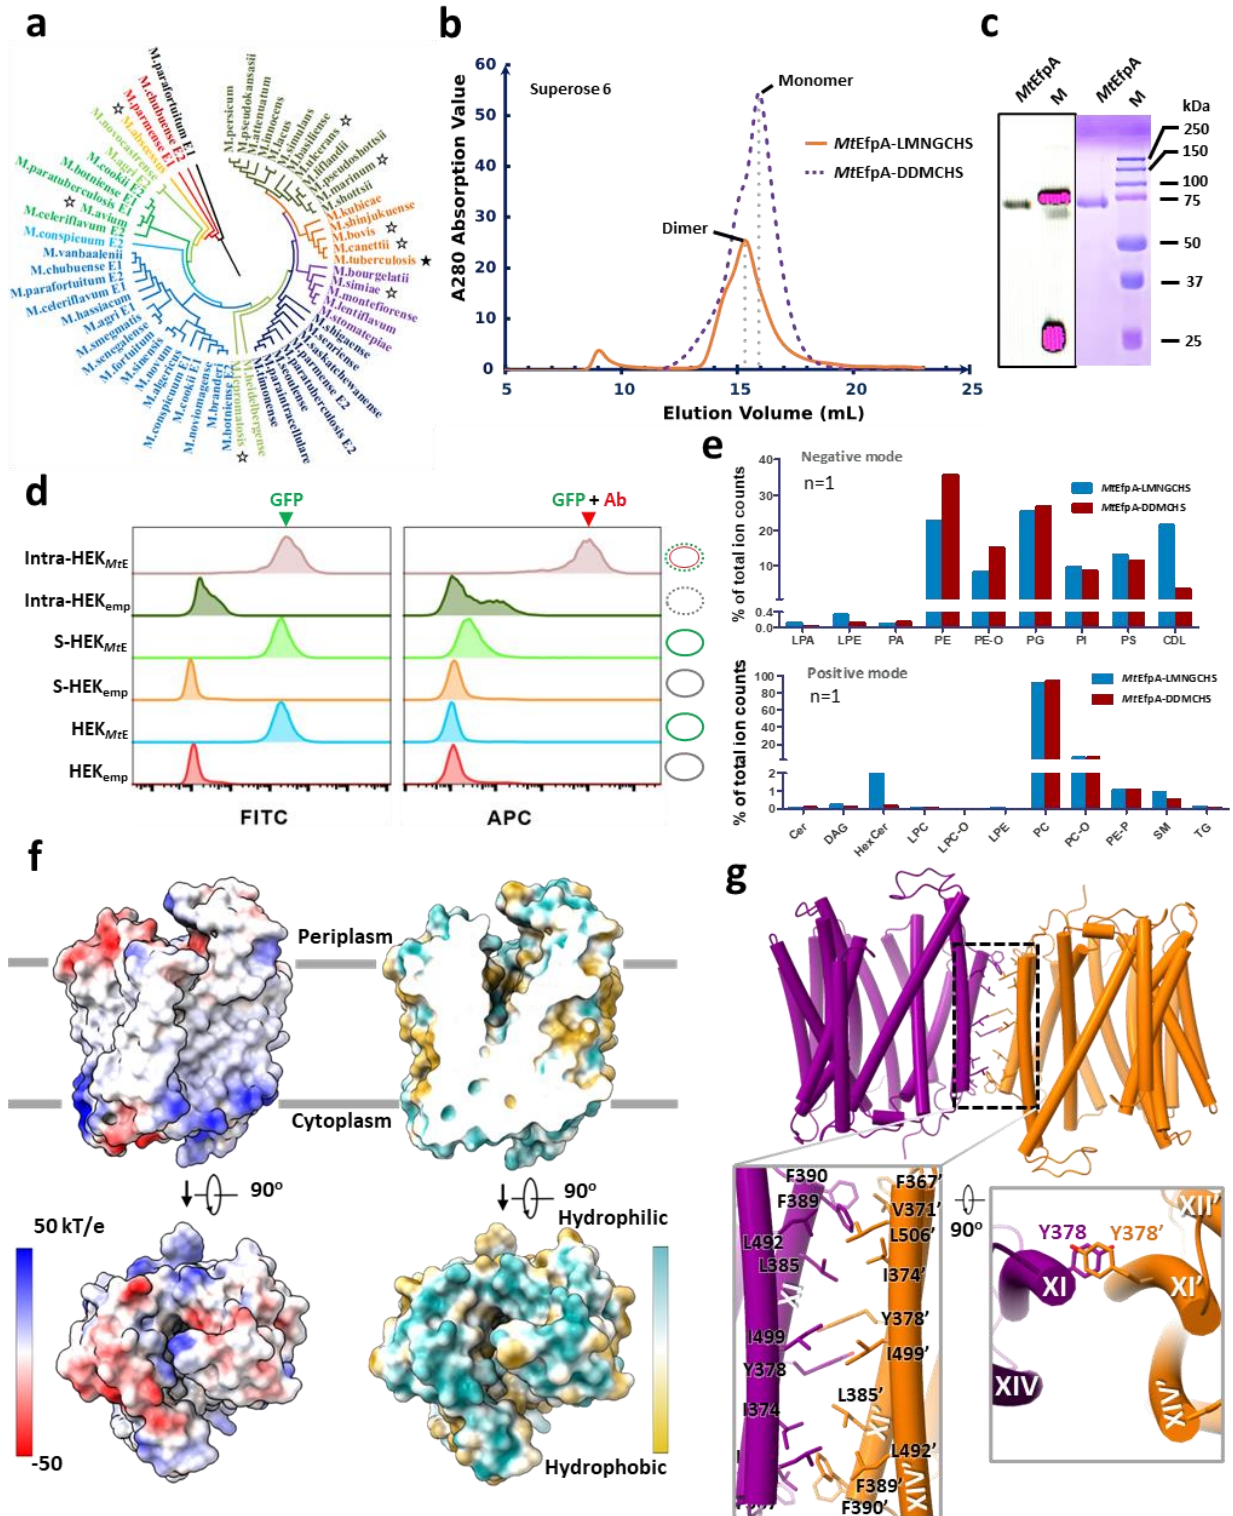

1

2 **Supplementary Fig. 1 | Characterization and structural analysis of EfpA.** a, Phylogenetic tree of EfpA  
 3 homologues. *M. tuberculosis* and other pathogenic species of mycobacterium are highlighted with black  
 4 star and empty stars, respectively. b, Size-exclusion chromatography profile of *MtEfpA* with C-terminal

5 GFP tag after solubilized by LMNG-CHS. Source data are provided as a Source Data file. **c**, SDS-PAGE with  
6 GFP fluorescence scan (left) and Coomassie stain (right). Source data are provided as a Source Data file.  
7 **d**, Flow cytometry assay of *MtEfpA* topology on HEK plasma membrane. HEK<sub>emp</sub>, HEK293 cells without  
8 *MtEfpA*-GFP expressed. HEK<sub>MtE</sub>, HEK293 cells with *MtEfpA*-GFP overexpressed. S-HEK<sub>emp</sub>/S-HEK<sub>MtE</sub>, cells  
9 incubated with APC anti-GFP antibody without permeabilization. Intra-HEK<sub>emp</sub>/Intra-HEK<sub>MtE</sub>, cells  
10 incubated with APC anti-GFP antibody after permeabilization. The oval on the right is represent the  
11 plasma membrane of cells. Green represents GFP signal, and red represents APC signal. Source data are  
12 provided as a Source Data file. **e**, Lipidomics and small-molecule analysis of dimeric *MtEfpA*-LMNGCHS  
13 and monomeric *MtEfpA*-DDMCHS using negative mode (top) and positive mode (bottom). One biological  
14 repeat was performed for this experiment. Source data are provided as a Source Data file. **f**, Electrostatic  
15 surface and hydrophobic surface of *MtEfpA*. **g**, Dimeric interface of *MtEfpA* dimer.

16

17

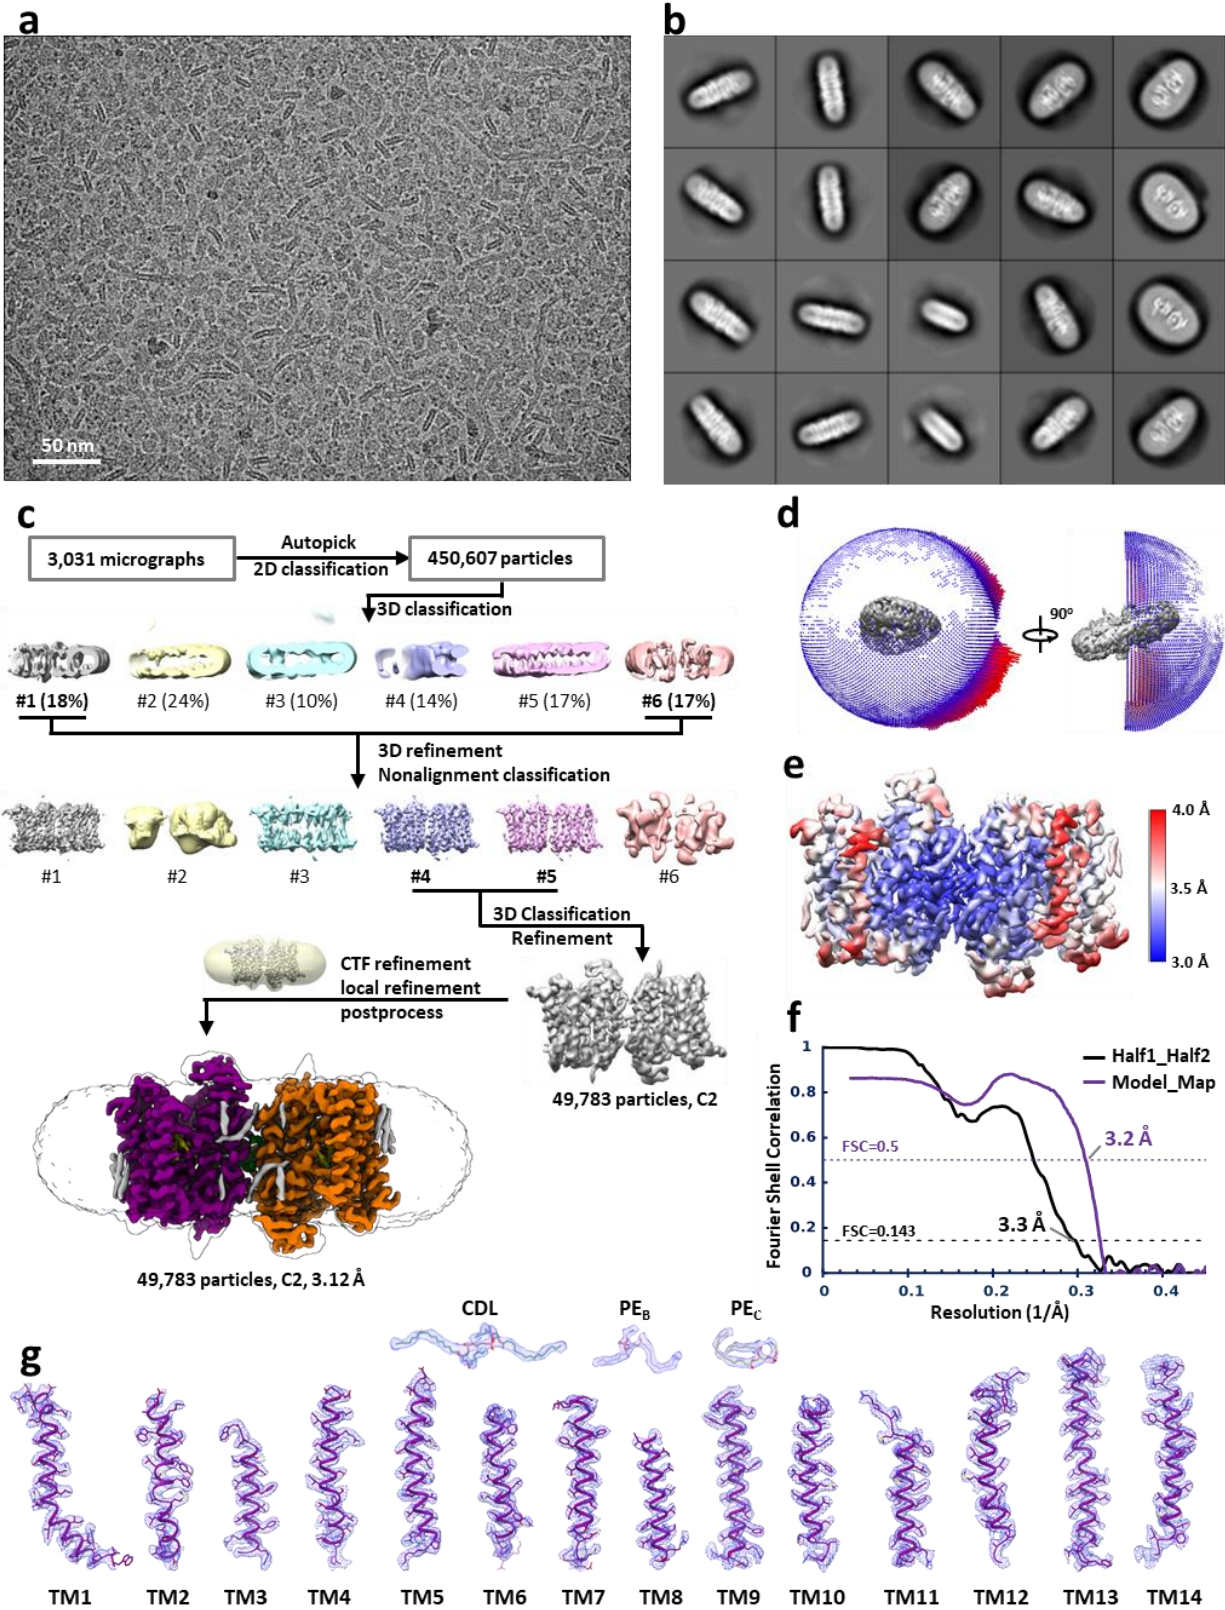

19 **Supplementary Fig. 2 | Cryo-EM reconstruction of dimeric *MtEfpA*.** **a**, Representative cryo-EM  
20 micrograph of *MtEfpA*. **b**, 2D class averages of *MtEfpA* with a box size of 266 Å. **c**, Flowchart for processing  
21 cryo-EM data of *MtEfpA*. **d**, Particle angle distribution for the final map of dimeric *MtEfpA*. **e**, Local  
22 resolution of the final cryo-EM map. **f**, Gold standard Fourier shell correlation (FSC) curve for the final  
23 reconstruction. Half map #1 vs. half map #2 of *MtEfpA* with masked shown in black. Model vs. refined  
24 map with masked shown in purple. **g**, Close-up view of all structure elements fitted in densities with  
25 contour level at  $5\sigma$  (blue).

26

27

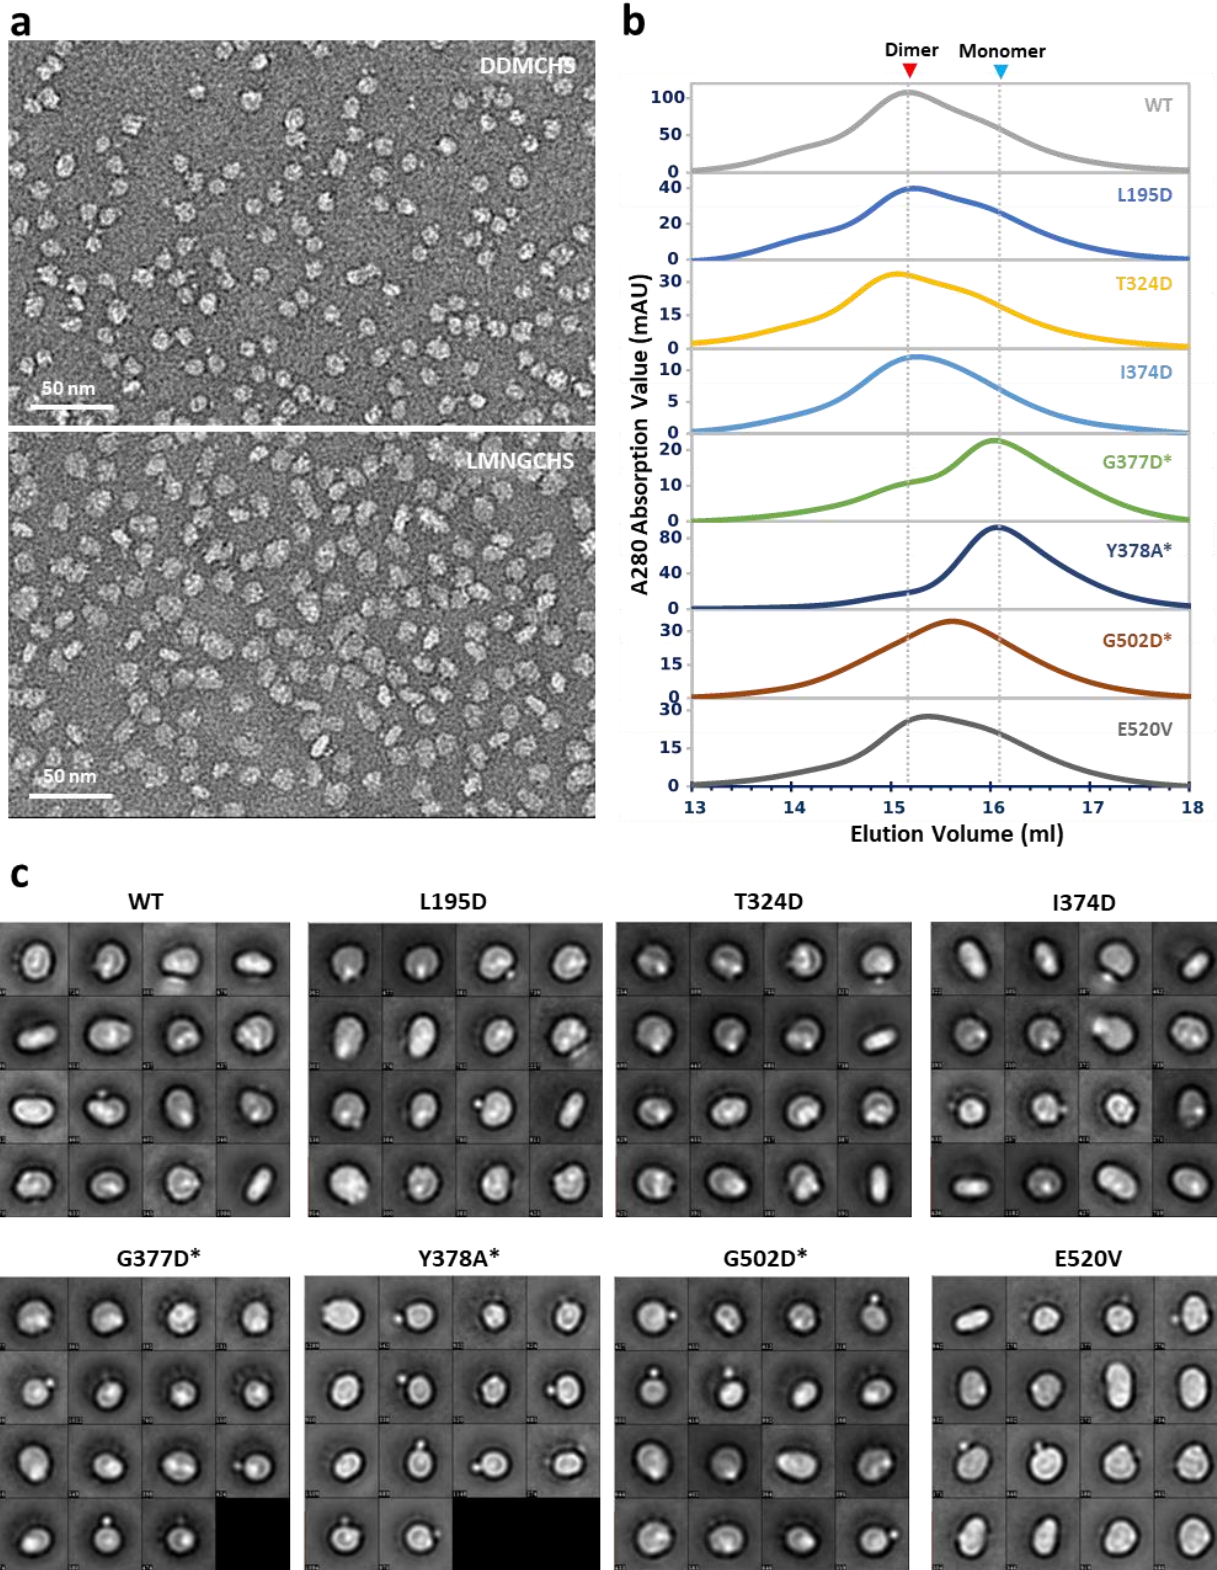

28

29 **Supplementary Fig. 3 | Negative stain analysis of *MtEfpA* and mutants.** **a**, Representative micrographs  
 30 of monomeric *MtEfpA* purified with DDMCHS (upper) and dimeric *MtEfpA* purified with LMNGCHS

31 (bottom). **b**, Size exclusion chromatography (SEC) profile of *MtEfpA* wide type and mutants purified with  
32 LMNGCHS. The mutants forming monomers were marked with stars. Source data are provided as a Source  
33 Data file. **c**, Negative stain 2D averages of *MtEfpA* wild type (WT) and mutants purified with LMNGCHS.

34

35

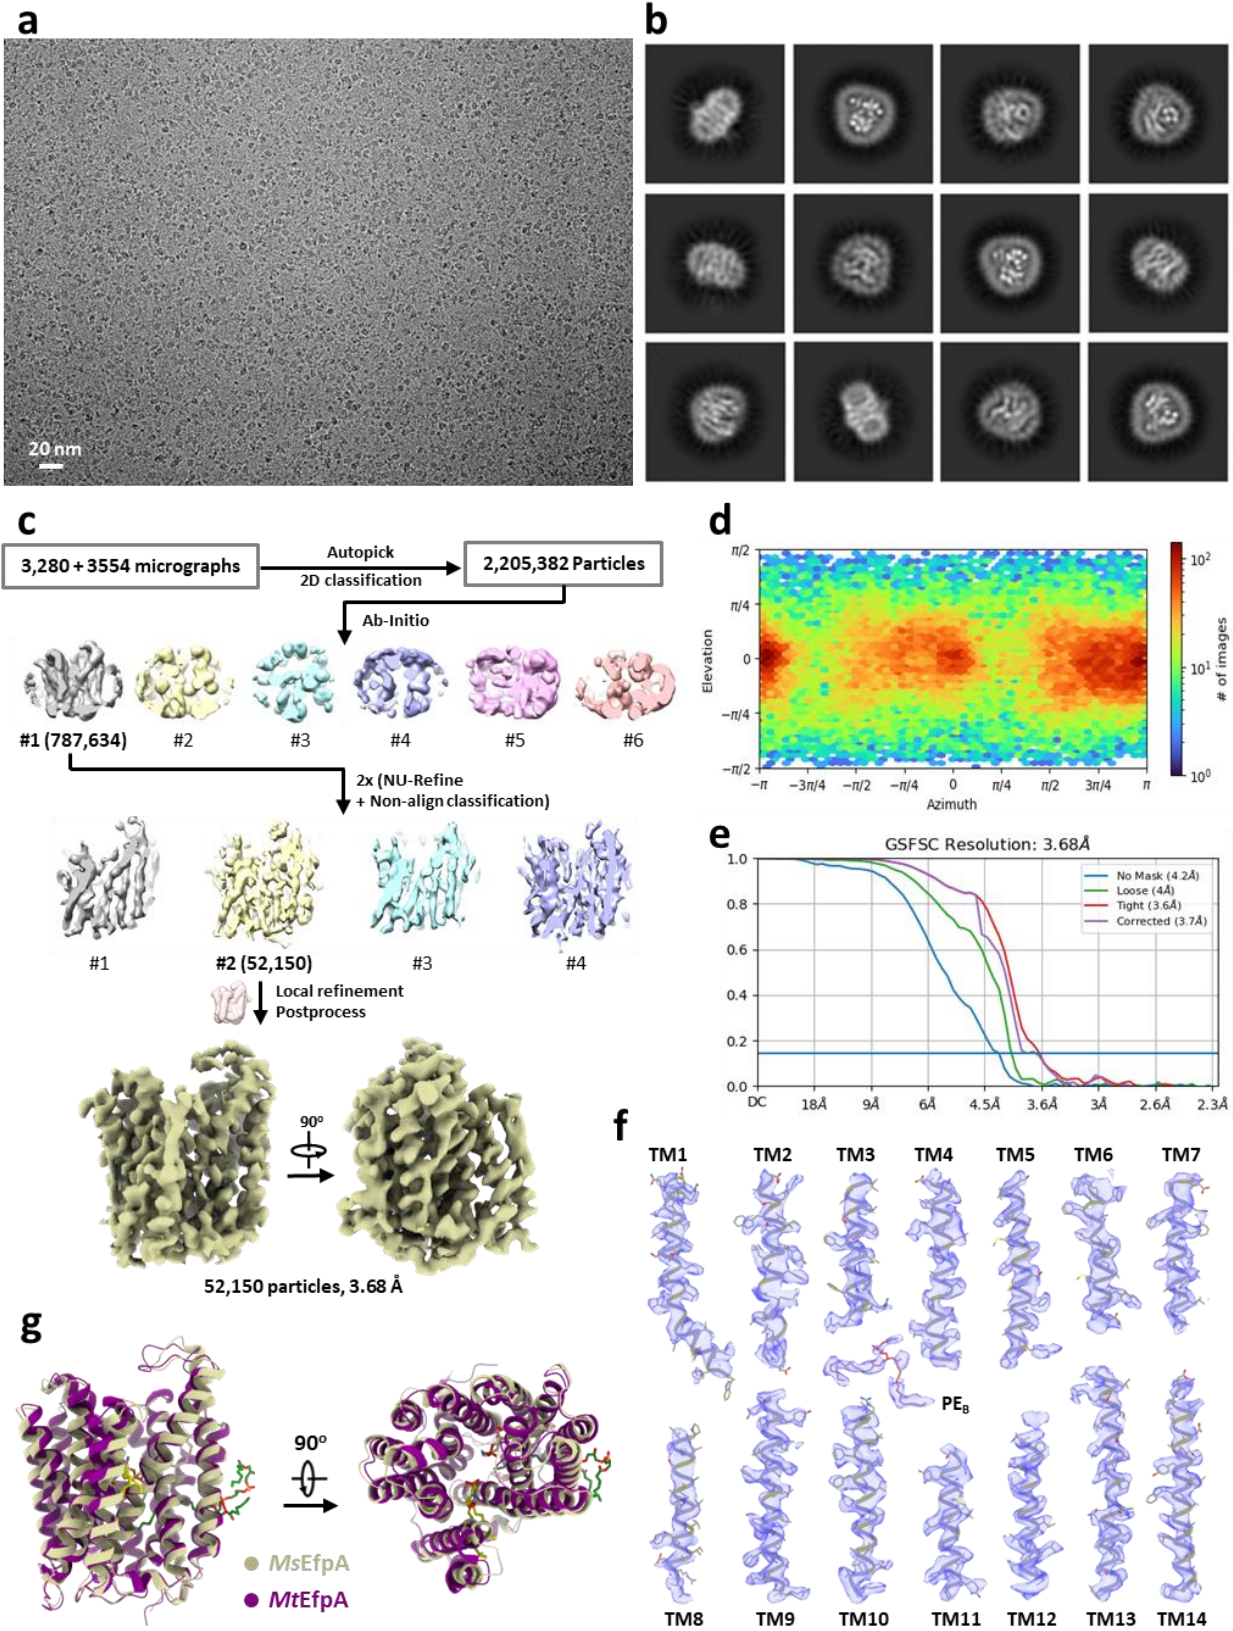

37 **Supplementary Fig. 4 | Cryo-EM reconstruction of monomeric MsEfpA.** **a**, Representative cryo-EM  
38 micrograph of MsEfpA. **b**, 2D class averages of MsEfpA with a box size of 180.4 Å. **c**, Flowchart for  
39 processing cryo-EM data of MsEfpA. **d**, Particle angle distribution for the final map of monomeric MsEfpA.  
40 **e**, Gold standard Fourier shell correlation (FSC) curve for the final reconstruction. **f**, Close-up view of all  
41 helices (olive) fitted in densities with contour level at  $5\sigma$  (blue) and a molecular of PE (brown) fitted into  
42 the density at lipid-binding site B. **g**, Superimposing the model of MsEfpA (olive) to MtEfpA (purple).

43

44



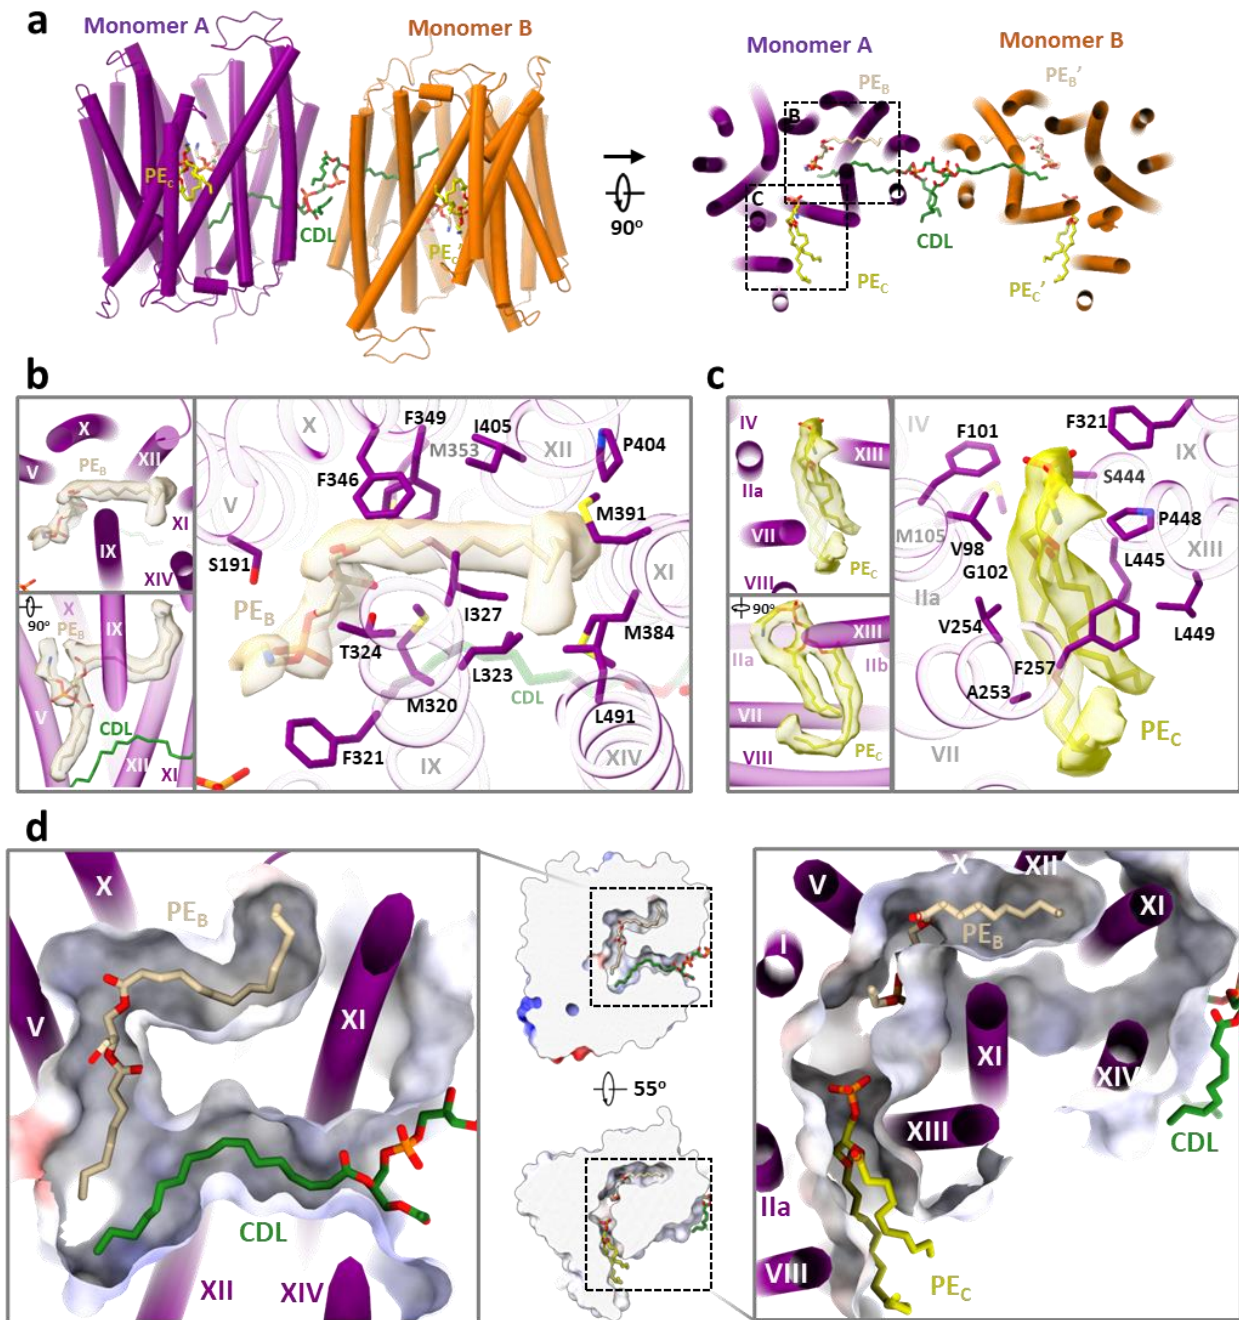

45

46 **Supplementary Fig. 5 | Lipids binding channel in *MtEfpA*.** **a**, The cartoon model of *MtEfpA* (purple and  
 47 orange) binding with cardiolipin (green) and two PE (wheat and yellow) from side view (left) and top view  
 48 (right). **b**, Superimposition of phosphatidylethanolamine (PE<sub>B</sub>) and the density at site B at a contour level  
 49 of 6σ, presented in top view (left upper), side view (left bottom), and the *MtEfpA* residues interacting with  
 50 PE<sub>B</sub> within 4 Å (right). **c**, The density at site C (6σ) fitted with the model of phosphatidylethanolamine (PE<sub>C</sub>)  
 51 showed in top view (left upper), side view (left bottom), and the residues of *MtEfpA* interacting with PE<sub>C</sub>  
 52 within 4 Å (right). **d**, Cross-sectional views of lipids binding cavities in *MtEfpA*. Left, the cavities of  
 53 cardiolipin (CDL, green) and phosphatidylethanolamine (PE<sub>B</sub>, wheat). Right, the cavities of  
 54 phosphatidylethanolamines (PE<sub>B</sub> and PE<sub>C</sub>).

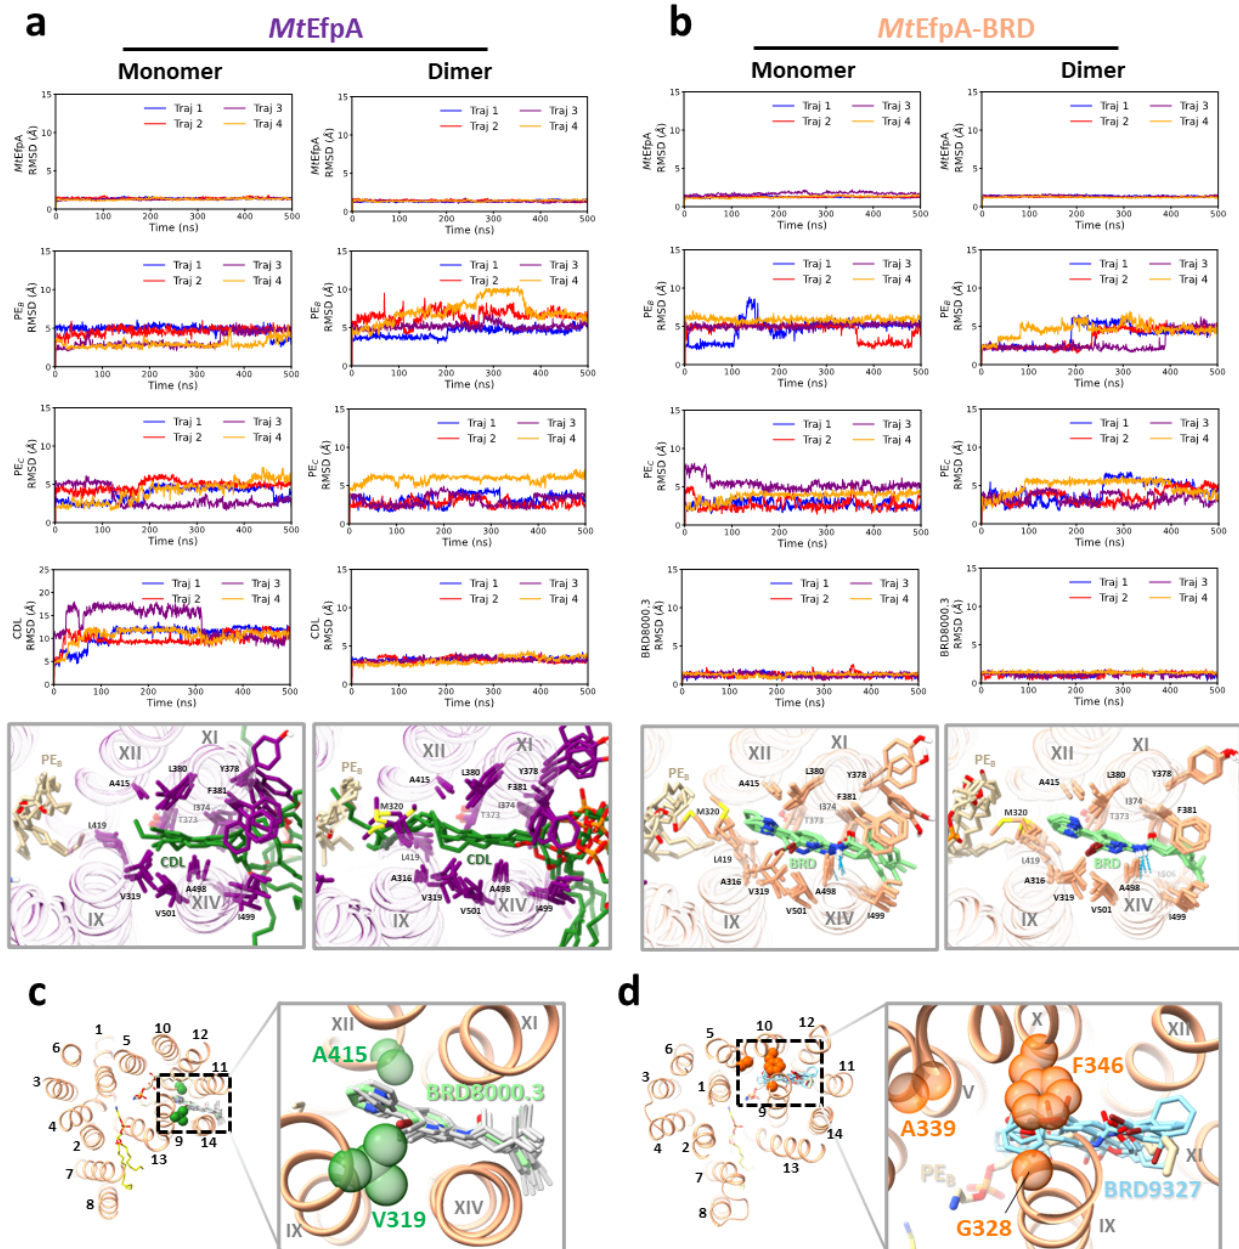

55

56 **Supplementary Fig. 6 | Molecular dynamics simulation analysis of ligands in *MtEfpA* and Docking of**  
 57 **BRD-9327. a**, Molecular dynamics simulation analysis for *MtEfpA* in monomer or dimer and RMSD of three  
 58 lipids. The bottom images present the interaction between *MtEfpA* and cardiolipin from the final frame  
 59 of four trajectories. **b**, Molecular dynamics simulation analysis for *MtEfpA*-BRD8000.3 in monomer or  
 60 dimer and RMSD of BRD-8000.3 and two lipids. The bottom images depict the interaction between *MtEfpA*  
 61 and BRD8000.3 from the final frame of four trajectories. The hydrogen bond is represented by a blue  
 62 dashed line. **c**, The configuration of BRD-8000.3 in one of the trajectories extracted from every 50 ns of  
 63 simulation (gray) superimposed with the solved structure of *MtEfpA*-BRD and the location of resistant  
 64 mutations to BRD-8000.3 (green). **d**, The location of resistant mutations (orange) to BRD-9327 (light blue)  
 65 on *MtEfpA* and the top 5 docking results of BRD-9327 at lipid-binding site B.

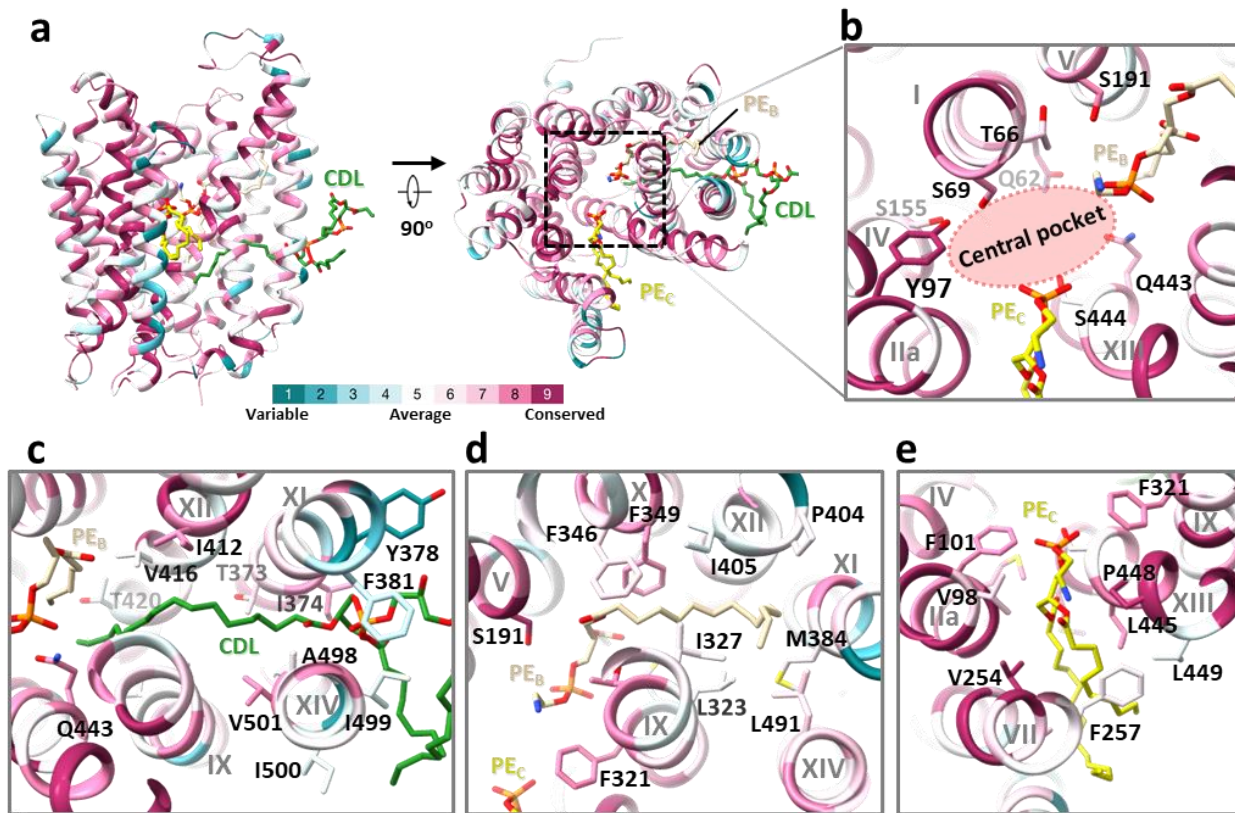

66

67 **Supplementary Fig. 7 | Conservation analysis of EfpA homologous in *Mycobacterium* at the hydrophilic**  
 68 **central pocket and three lipid-binding sites. a,** Overall structure of *MtEfpA*-lipids colored by conservation  
 69 of 61 EfpA homologues from different species of *Mycobacterium*. **b-e,** Zoomed-in view of residue  
 70 conservation at the hydrophilic central pocket (**b**) and three lipid-binding sites (**c-e**).

71

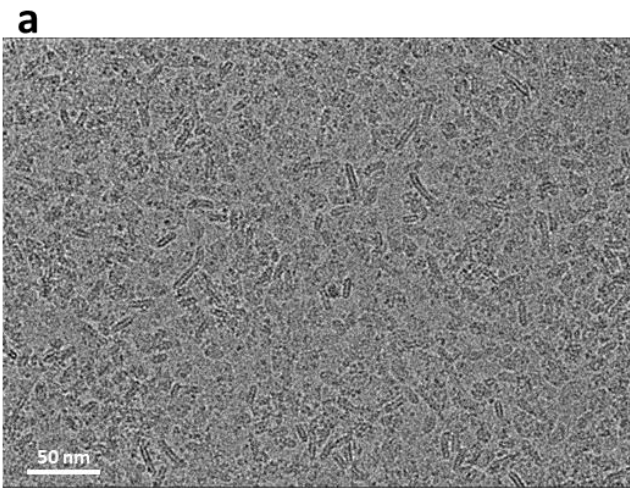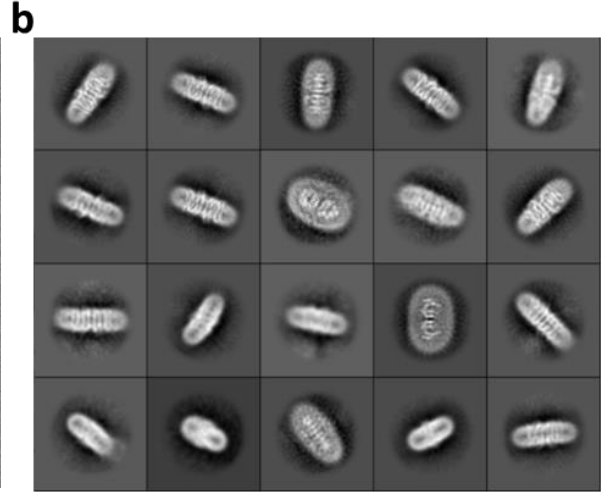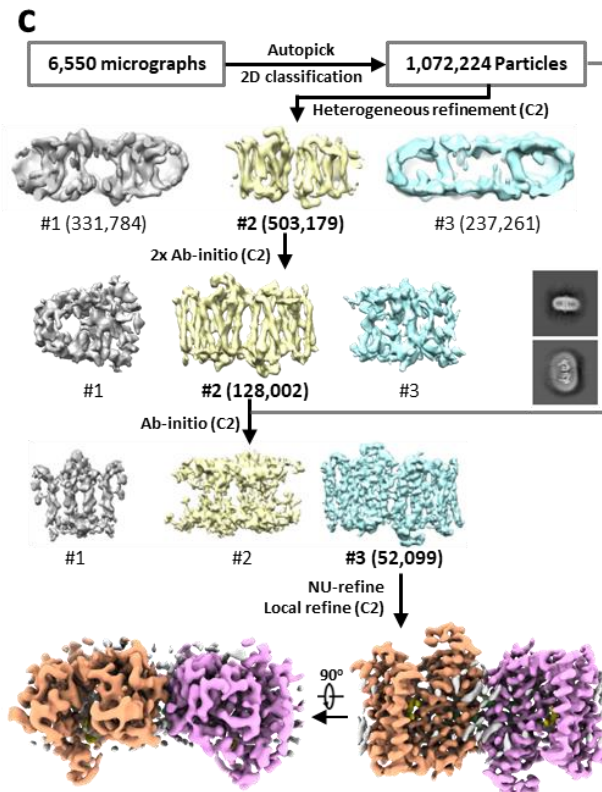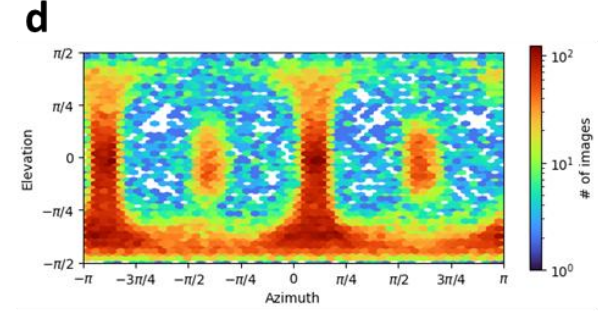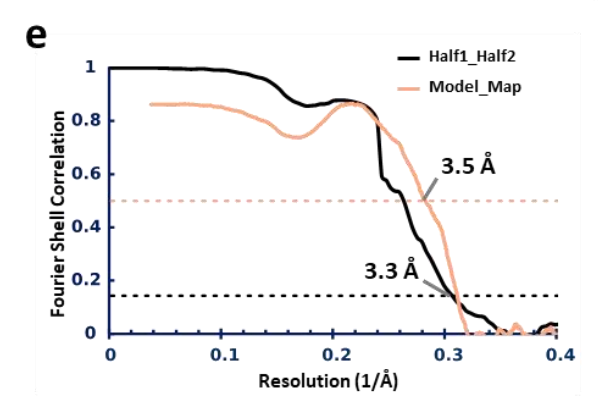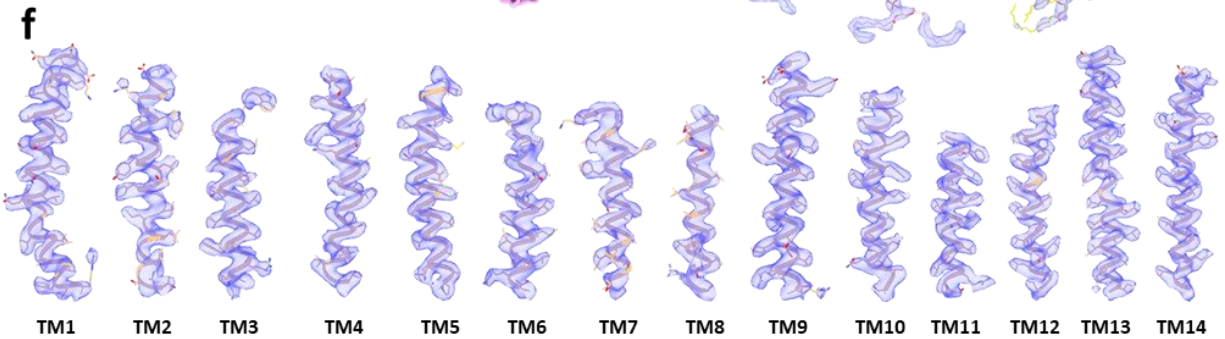

73 **Supplementary Fig. 8 | Cryo-EM reconstruction of dimeric *MtEfpA*-BRD8000.3.** **a**, Representative cryo-  
74 EM micrograph of *MtEfpA* complexed with BRD-8000.3. **b**, 2D class averages of *MtEfpA* with a box size of  
75 252 Å. **c**, Flowchart for processing cryo-EM data of *MtEfpA*-BRD8000.3. **d**, Particle angle distribution for  
76 the final map of dimeric *MtEfpA*-BRD8000.3. **e**, Gold standard Fourier shell correlation (FSC) curve for the  
77 final reconstruction of *MtEfpA*-BRD8000.3. **f**, Close-up view of all structural elements of *MtEfpA*-  
78 BRD8000.3 fitted in densities with contour level at  $5\sigma$  (blue).

79

80

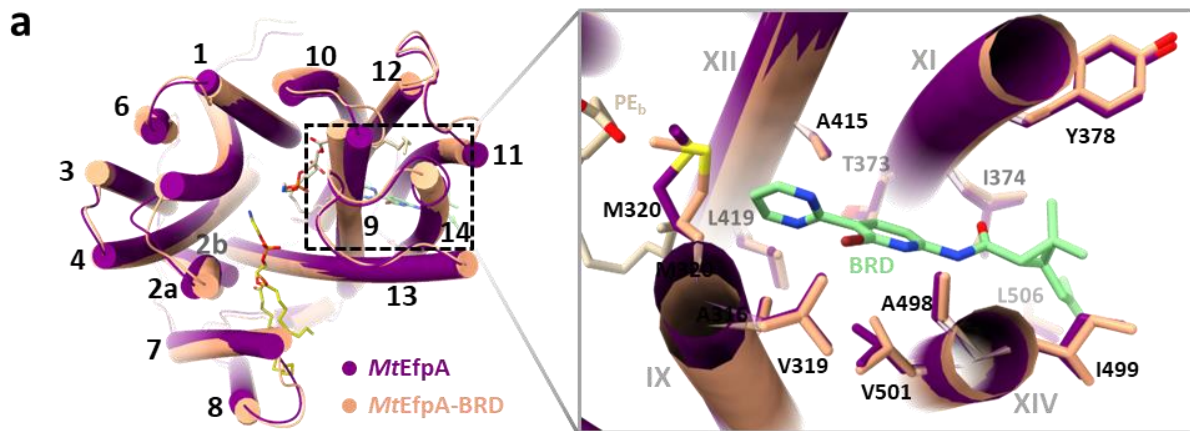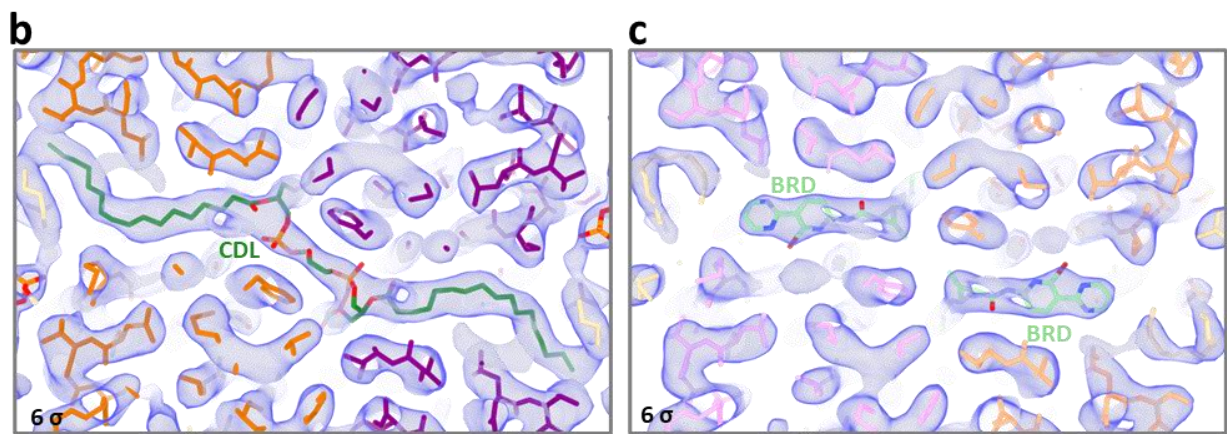

81

82 **Supplementary Fig. 9 | Structural comparison of *MtEfpA* binding with cardiolipin and BRD-8000.3. a,**  
 83 **Superimposing structure of *MtEfpA* (purple) and *MtEfpA*-BRD (orange) at binding site A. b, c, Density of**  
 84 **cardiolipin (dark green) in *MtEfpA* (b) and BRD-8000.3 (light green) in *MtEfpA*-BRD (c) with a contour level**  
 85 **at 6σ.**

86

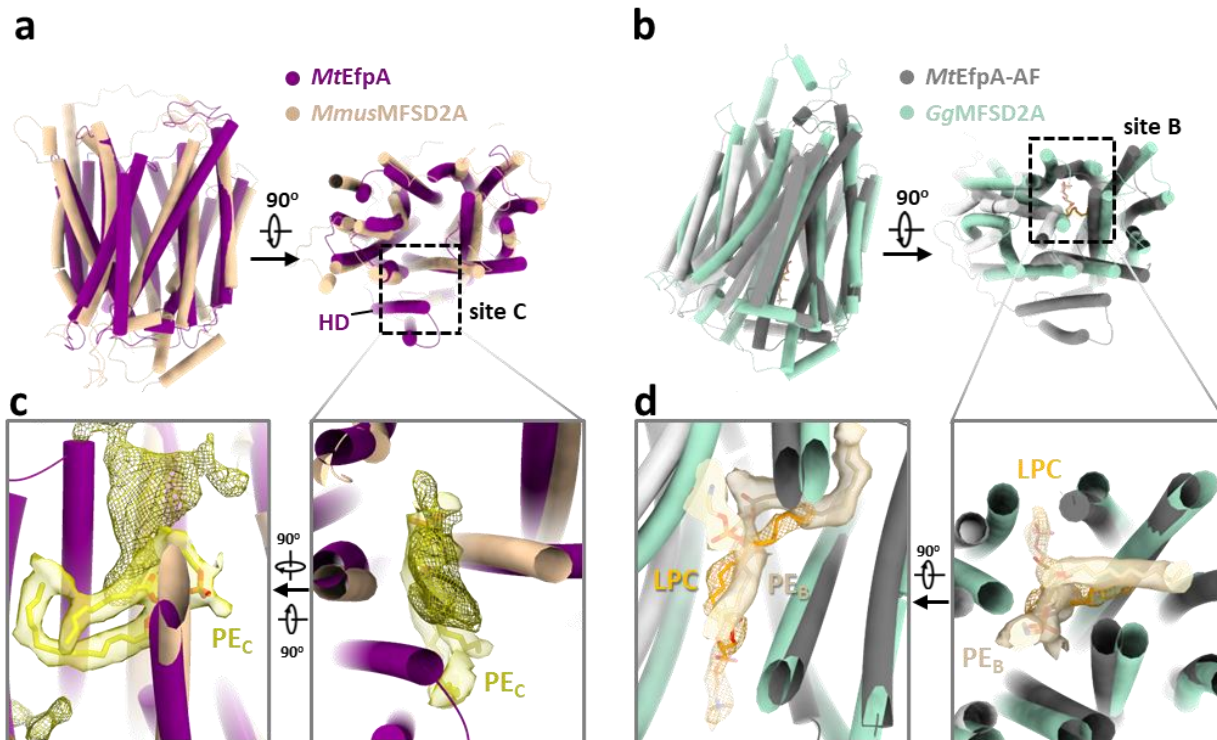

87

88 **Supplementary Fig. 10 | Comparison of the structures of *MtEfpA* to the structures of MFSD2A.** **a,**  
 89 Superimposing the outward-open structure of *MtEfpA* (purple) with the outward-open structure of  
 90 lysophospholipid transporter MFSD2A from *Mus musculus* (*MmusMFSD2A*, light orange. PDB ID: 7N98).  
 91 **b,** Superimposing the inward structure of *MtEfpA*-AF (gray) with the inward structure of MFSD2A from  
 92 *Gallus gallus* (*GgMFSD2A*, blue-green. PDB ID: 7MJS). **c,** Zoomed-in view of lipid binding site C shows the  
 93 lipids density in *MtEfpA* (yellow) and *MmusMFSD2A* (mesh, EMD-24252). **d,** Zoomed-in view of lipid  
 94 binding site B shows the lipids density in *MtEfpA* (wheat) and the density of lysophosphatidylcholine (LPC,  
 95 orange, EMD-23883) in *GgMFSD2A*.

96

97

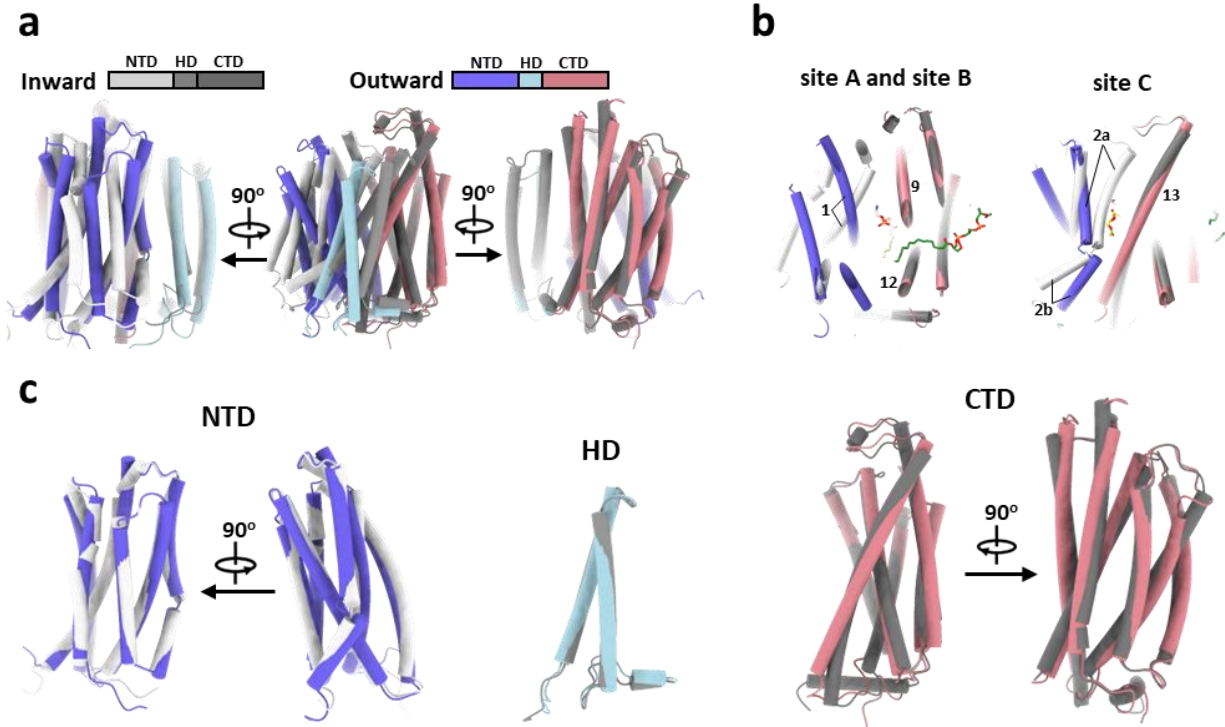

98

99 **Supplementary Fig. 11 | Inward and outward state of *MtEfpA*.** **a**, Superimposing AlphaFold-predicted  
 100 inward-state of *MtEfpA* (*MtEfpA*-AF, lightgray-gray-darkgray) with the outward state of *MtEfpA* (blue-  
 101 lightblue-lightpink). **b**, The lipid binding site A/B (left) and site C (right) after superimposing. **c**, Alignment  
 102 of NTD (left), HD (mid) and CTD (right) from *MtEfpA* and *MtEfpA*-AF separately.

103



|                                         | <b><i>MtEfpA</i></b><br><b>(EMD-37641)</b><br><b>(PDB 8WM5)</b> | <b><i>MtEfpA-BRD</i></b><br><b>(EMD-42204)</b><br><b>(PDB 8UFD)</b> | <b><i>MsEfpA</i></b><br><b>(EMD-42205)</b><br><b>(PDB 8UFE)</b> |           |
|-----------------------------------------|-----------------------------------------------------------------|---------------------------------------------------------------------|-----------------------------------------------------------------|-----------|
| <b>Data collection and processing</b>   |                                                                 |                                                                     |                                                                 |           |
| Magnification                           | 45,000                                                          | 29,000                                                              | 36,000                                                          | 130,000   |
| Voltage (kV)                            | 200                                                             | 300                                                                 | 200                                                             | 300       |
| Electron exposure (e-/ Å <sup>2</sup> ) | 54                                                              | 49                                                                  | 44                                                              | 70        |
| Defocus range (µm)                      | 1.2-2.5                                                         | 1.2-2.5                                                             | 1.2-2.5                                                         | 1.2-2.2   |
| Pixel size (Å)                          | 0.87                                                            | 0.788                                                               | 1.1                                                             | 0.6632    |
| Final Micrographs processed (no.)       | 3,031                                                           | 6,550                                                               | 3,280                                                           | 3,554     |
| Initial particle images (no.)           | 2,424,800                                                       | 2,014,853                                                           | 6,546,828                                                       | 3,142,841 |
| Final particle images (no.)             | 49,783                                                          | 52,099                                                              | 52,150                                                          |           |
| Symmetry imposed                        | C2                                                              | C2                                                                  | C1                                                              |           |
| Map resolution (Å)                      | 3.12                                                            | 3.26                                                                | 3.68                                                            |           |
| FSC threshold                           | 0.143                                                           | 0.143                                                               | 0.143                                                           |           |
| <b>Refinement</b>                       |                                                                 |                                                                     |                                                                 |           |
| Model resolution (Å)                    | 3.2                                                             | 3.5                                                                 | 4.1                                                             |           |
| FSC threshold                           | 0.5                                                             | 0.5                                                                 | 0.5                                                             |           |
| Model composition                       |                                                                 |                                                                     |                                                                 |           |
| Non-hydrogen atoms                      | 7179                                                            | 7164                                                                | 3449                                                            |           |
| Protein residues                        | 950                                                             | 950                                                                 | 470                                                             |           |
| Ligands                                 | 5                                                               | 6                                                                   | 1                                                               |           |
| <i>B</i> factors (Å <sup>2</sup> )      |                                                                 |                                                                     |                                                                 |           |
| Protein                                 | 55.14                                                           | 101.10                                                              | 114.57                                                          |           |
| Ligand                                  | 55.79                                                           | 102.03                                                              | 105.33                                                          |           |
| R.m.s. deviations                       |                                                                 |                                                                     |                                                                 |           |
| Bond lengths (Å)                        | 0.009                                                           | 0.030                                                               | 0.003                                                           |           |
| Bond angles (°)                         | 0.924                                                           | 1.462                                                               | 0.640                                                           |           |
| Validation                              |                                                                 |                                                                     |                                                                 |           |
| MolProbity score                        | 1.88                                                            | 1.90                                                                | 2.19                                                            |           |
| Clashscore                              | 12.86                                                           | 18.45                                                               | 12.83                                                           |           |
| Poor rotamers (%)                       | 0.00                                                            |                                                                     |                                                                 |           |
| Ramachandran plot                       |                                                                 |                                                                     |                                                                 |           |
| Favored (%)                             | 96.19                                                           | 97.25                                                               | 94.44                                                           |           |
| Allowed (%)                             | 3.81                                                            | 2.75                                                                | 5.34                                                            |           |
| Disallowed (%)                          | 0.00                                                            | 0.00                                                                | 0.21                                                            |           |
