# Supplementary material for: Structures of the Mycobacterium tuberculosis efflux pump EfpA reveal the mechanisms of transport and inhibition
Source: PubMed Central journal article supplement — Nat Commun. 2024 Sep 4;15:7710. doi: 10.1038/s41467-024-51948-9 (PMC11375168; doi:10.1038/s41467-024-51948-9), 2024-09-04
Supplement: 41467_2024_51948_MOESM3_ESM.pdf [file 41467_2024_51948_MOESM3_ESM.pdf]

## **Description of Additional Supplementary Files**

### **File name: Supplementary Data 1**

Description: Primers used in this study.

### **File name: Supplementary Data 2**

Description: The raw data, mzML files, and mFQL files of the shotgun lipidomic and small-molecule analysis.

### **File name: Supplementary Data 3**

Description: The topology files, initial structure files, simulation parameter control files, and result data files of molecular dynamics trajectories.

### **File name: Supplementary Movie 1**

Description: The lipids binding pathway within *MtEfpA*.

### **File name: Supplementary Movie 2**

Description: Conformational transition of *MtEfpA* between inward-open and outward-open conformation.
